# Supplementary material
Source: HighWire-hosted journal article supplement (https://cmaj.ca/highwire/filestream/58500/field_highwire_adjunct_files/0/pg1267.pdf)
Supplement: pg1267.pdf [file pg1267.pdf]

## Le tabac devant les tribunaux

Le lobby anti-tabac a connu récemment une période houleuse devant les tribunaux. Le 21 février, la Cour suprême de la Colombie-Britannique a rejeté la tentative de la province qui voulait intenter aux fabricants de produits du tabac une poursuite pour les milliards de dollars consacrés au traitement des maladies liées au tabagisme.<sup>1</sup> Le 21 mars, la Cour suprême des États-Unis a cassé, par 5 voix contre 4, la décision de la FDA (prise en 1996, après tergiversations), qui avait affirmé que la nicotine était un médicament et que les produits du tabac étaient donc assujettis à sa réglementation.<sup>2</sup> Le 22 mars, la Cour suprême de la Colombie-Britannique a cassé une interdiction que la Commission des accidents du travail de la province avait imposée contre le tabac au travail dans des endroits comme les bars, les restaurants et les prisons.<sup>3</sup>

Qu'est-ce qui n'a pas marché? En Colombie-Britannique, la Cour suprême a décidé que le gouvernement n'avait pas le pouvoir constitutionnel d'intenter des poursuites en justice contre les sociétés mères d'entreprises canadiennes, en dépit de preuves abondantes démontrant que ces entreprises savaient que la nicotine est toxicomanogène et qu'elles ont vendu des cigarettes aux enfants. Dans l'affaire américaine, les 5 juges conservateurs ont soutenu qu'en vertu de sa loi constitutive, la FDA est tenue d'assurer que tout médicament mis en marché aux États-Unis est «sûr et efficace». Les preuves présentées par la FDA pour démontrer que le tabac n'est pas sûr sous-entendent qu'il faut en interdire la vente. Une telle obligation ne concorderait toutefois pas avec l'intention exprimée par le Congrès de garder le tabac sur le marché. La Cour a donc conclu que le tabac échappe au pouvoir que la FDA a reçu du Congrès. Dans le cas de la deuxième poursuite en Colombie-Britannique, la Cour a décidé que la Commission des accidents du travail n'avait pas tenu d'audiences publiques suffisantes, conformément à sa loi constitutive, avant d'imposer l'interdiction.

Nous n'irons pas jusqu'à traiter la loi d'âne comme M. Bumble. Si la loi reflète

les valeurs et les aspirations de la société, elle est aussi le miroir de ses contradictions. Dans ces décisions, on a poli le miroir pour qu'il reflète les intérêts des milieux d'affaires au détriment de la santé publique. Comme le faisait remarquer un propriétaire de bar en Colombie-Britannique, «la cigarette, ça sent l'argent». Faudrait-il nous étonner que la Cour suprême des États-Unis se soit sentie obligée de refuser à la FDA le pouvoir de réglementer «une industrie qui constitue un rouage important de l'économie américaine»?<sup>2</sup>

L'expression «justice différée est justice refusée» s'applique habituellement à l'accusé. Ces décisions ont retardé l'adoption de mesures de contrôle qui s'imposent depuis longtemps et qui protégeraient le meilleur intérêt du public. La justice refusée est celle qu'on doit à un million d'enfants et d'adolescents nord-américains qui commencent à fumer chaque année, aux travailleurs qui œuvrent dans des environnements remplis de fumée et aux contribuables dont l'argent sert à traiter des maladies évitables pendant que les listes d'attente s'allongent et que la qualité des services essentiels se dégrade.

Entre-temps, le gouvernement de la Colombie-Britannique présente une mesure législative qui satisfera à l'objection de la Cour et permettra d'aller de l'avant avec la poursuite visant à recouvrer des dommages-intérêts, des efforts en cours visant à présenter au Congrès américain une mesure législative afin d'étendre le pouvoir de la FDA et la Commission des accidents du travail de la Colombie-Britannique reprendra ses audiences publiques. Au moment d'aller sous presse, un ancien vendeur de cigarettes, Joseph Battaglia, a obtenu le droit d'intenter une poursuite à un géant de l'industrie du tabac devant une cour canadienne.<sup>4</sup> Nous allons suivre cette cause avec intérêt. — JAMC

### Références

1. [www.courts.gov.bc.ca/jdb-txt/sc/00/03/s00-0312.html](http://www.courts.gov.bc.ca/jdb-txt/sc/00/03/s00-0312.html)
2. [www.laws.findlaw.com/US/000/98-1152.html](http://www.laws.findlaw.com/US/000/98-1152.html)
3. [www.courts.gov.bc.ca/jdb-txt/sc/00/05/s00-0505.html](http://www.courts.gov.bc.ca/jdb-txt/sc/00/05/s00-0505.html)
4. Mitrovica A. Smoker wins right to sue tobacco firms. *Globe and Mail* [Toronto] 2000 Apr 3;Sect A:1,8.
